# Supplementary material for: Thermal treatment of hair for the synthesis of sustainable carbon quantum dots and the applications for sensing Hg2+
Source: PubMed Central journal article supplement (PMC5071893; doi:10.1038/srep35795), 2016-10-20
Supplement: srep35795-s1.pdf [file srep35795-s1.pdf]

## SUPPORTING INFORMATION

# **Thermal treatment of hair for the synthesis of sustainable carbon quantum dots and the applications for sensing Hg<sup>2+</sup>**

**Yongming Guo<sup>1,\*</sup>, Lianfeng Zhang<sup>1</sup>, Fengpu Cao<sup>1</sup>, and Yumin Leng<sup>2,\*</sup>**

<sup>1</sup>College of Chemistry and Pharmaceutical Engineering, Nanyang Normal University,  
Nanyang 473061, China

<sup>2</sup>College of Physics and Electronic Engineering, Nanyang Normal University,  
Nanyang 473061, China

\*corresponding authors: Y. G. (email: chinahenangm@163.com) or Y. L. (email: ymleng@nynu.edu.cn).

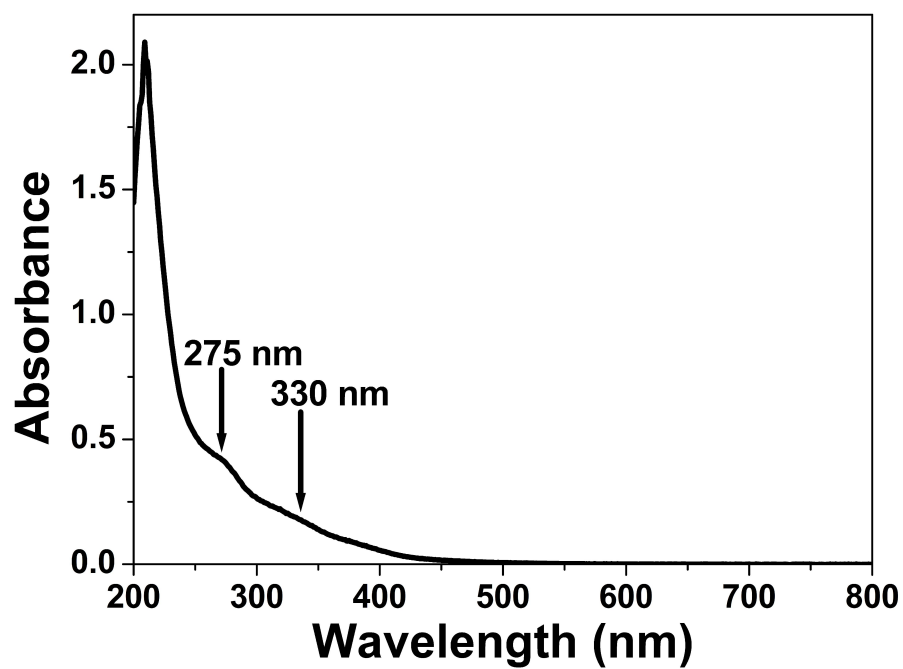

Figure S1 UV-vis absorption spectrum of CQDs.

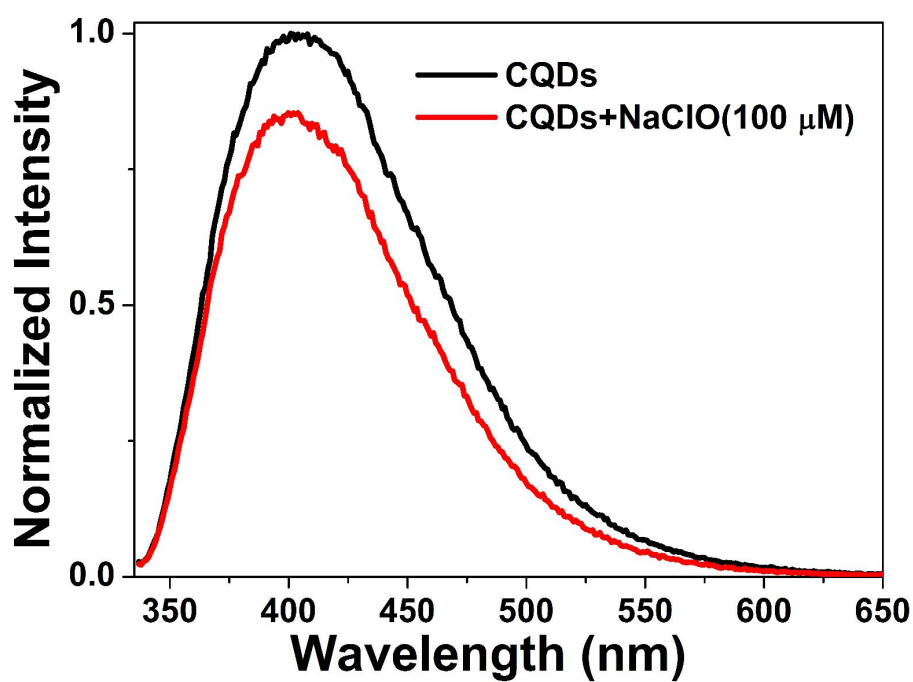

Figure S2 Emission spectra of CQDs in the absence and presence of 100  $\mu\text{M}$  NaClO (Excitation wavelength is 330 nm.).

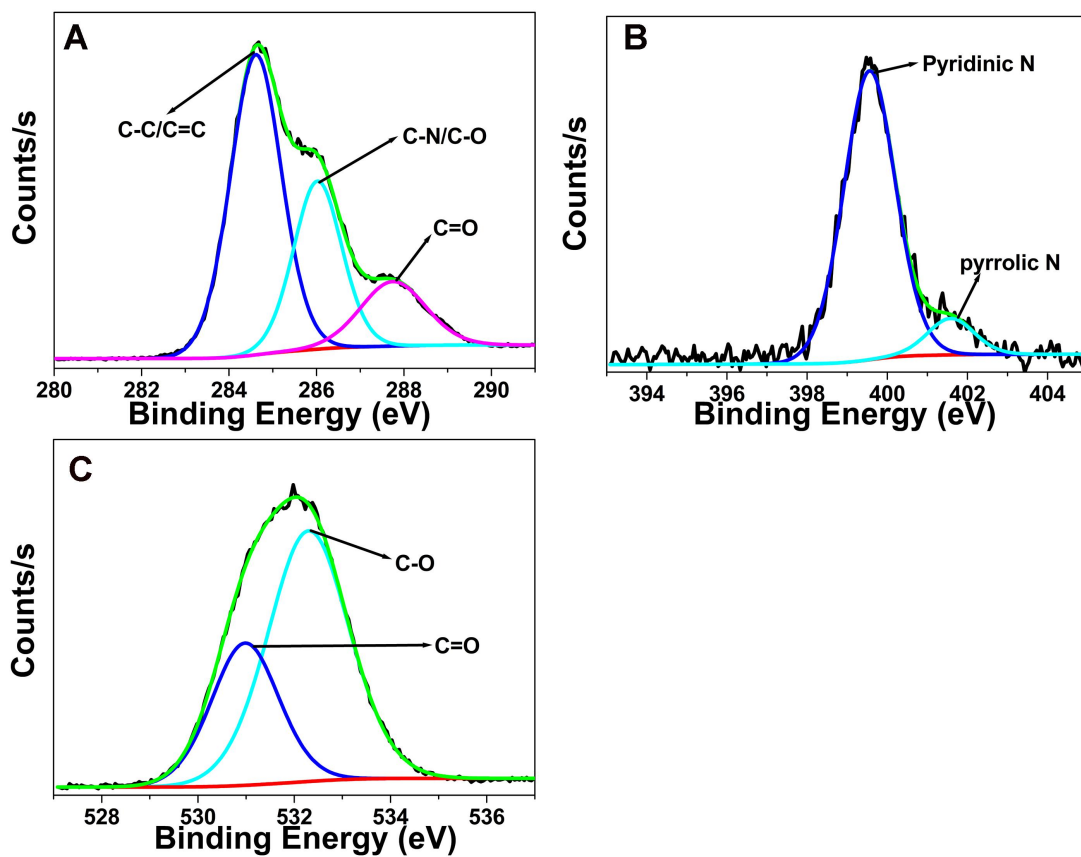

Figure S3 High resolution XPS spectra for C1s, N1s, and O1s of CQDs.

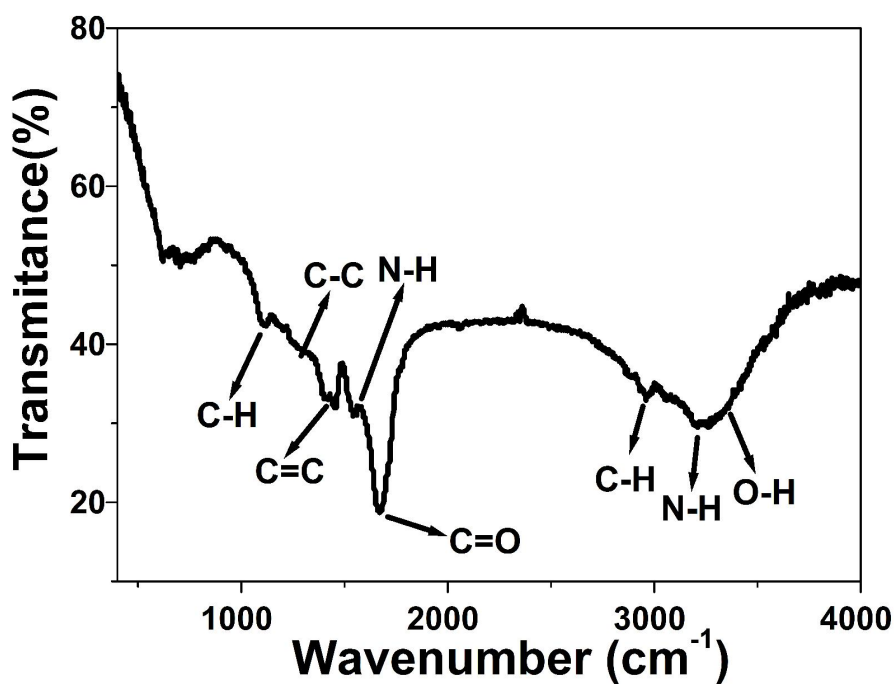

Figure S4 FT-IR absorption spectrum of CQDs.

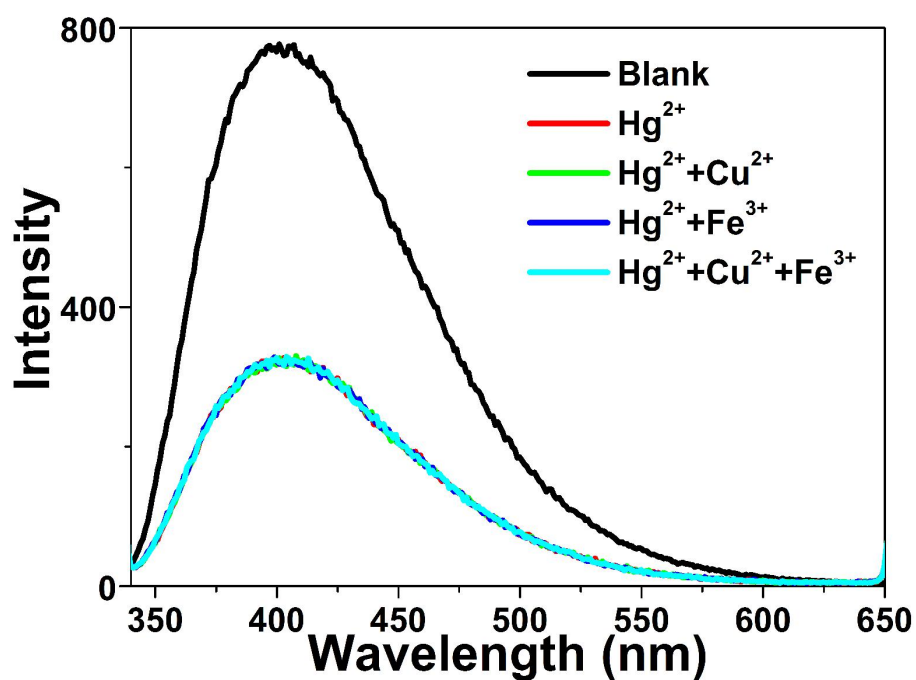

**Figure S5** Fluorescence emission spectra of CQDs in the absence and presence of Hg<sup>2+</sup> (100 μM), Cu<sup>2+</sup> (20 μM) and Fe<sup>2+</sup> (20 μM).

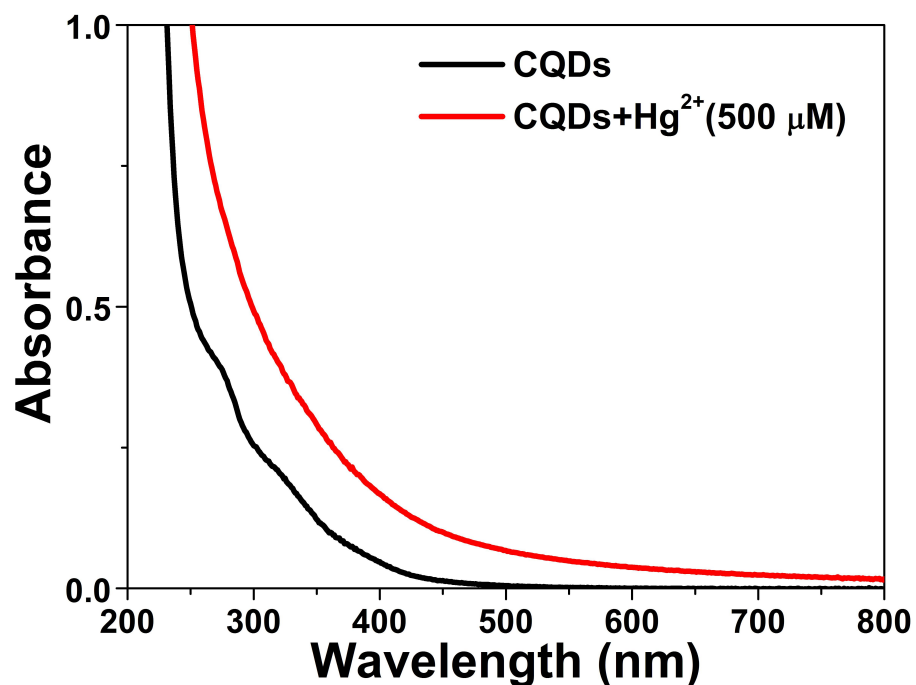

**Figure S6** UV-vis absorption spectra of CQDs in the absence and presence of 500 μM Hg<sup>2+</sup>.

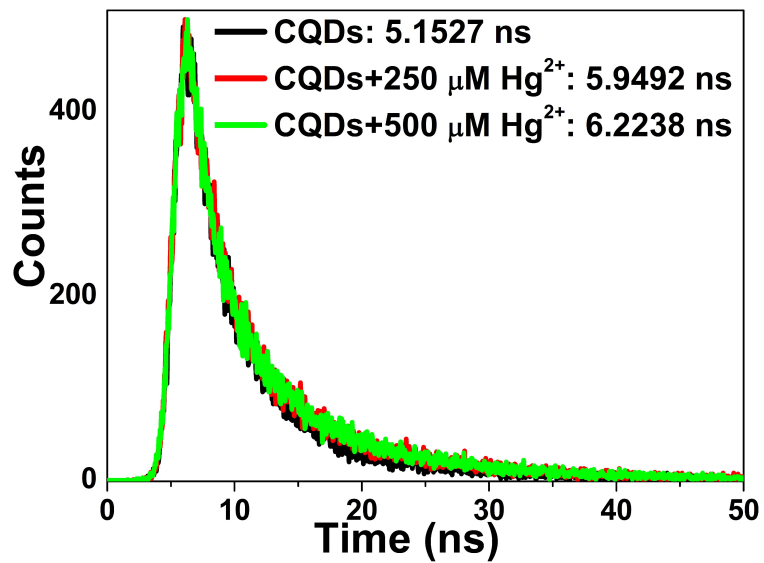

**Figure S7** Fluorescence decay curve of CQDs in the absence and presence of 250 μM and 500 μM Hg<sup>2+</sup> (Excitation wavelength is 330 nm, emission wavelength is 415 nm.).

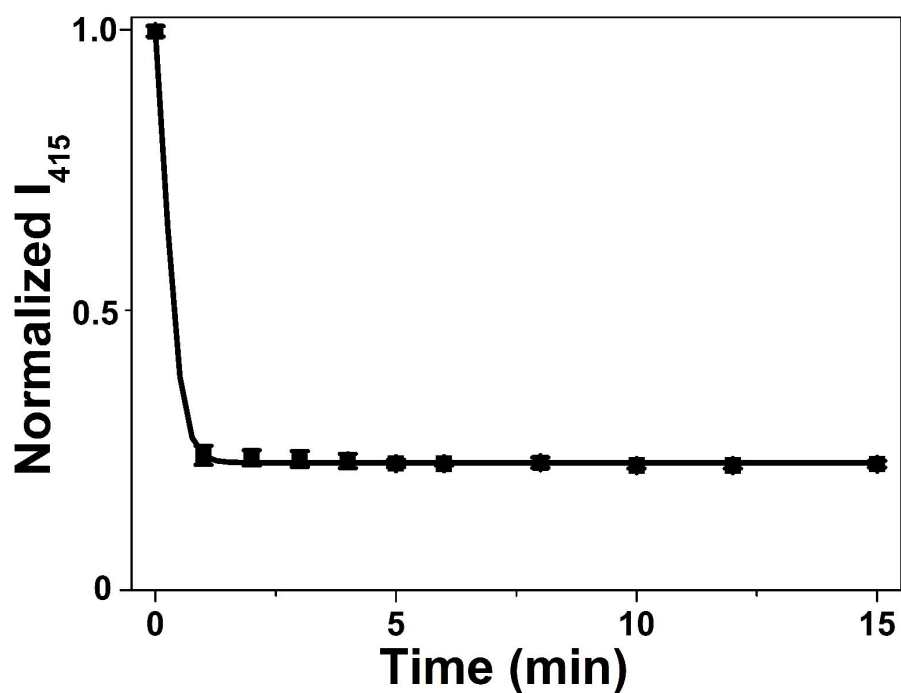

**Figure S8** The effect of incubation time on the fluorescence intensity of CQDs at 415 nm in the presence of 500 μM Hg<sup>2+</sup> (performed in pH 5.0, 50 mM NaAc-HAc buffer; excitation wavelength is 330 nm.).

**Table S1.** Comparison of the performance of different CQDs for Hg<sup>2+</sup> detection.

| Probes                         | Detection limit    | Linear range                     | Quantum yield (%) | Reference |
|--------------------------------|--------------------|----------------------------------|-------------------|-----------|
| CQDs                           | 10 nM              | 0-5 $\mu$ M                      | 68                | 1         |
| Nitrogen-doped CQDs            | 0.23 $\mu$ M       | 0-25 $\mu$ M                     | 15.7              | 2         |
| Carbon nitride quantum dots    | 0.14 $\mu$ M       | 0.1-10 $\mu$ M,<br>10-30 $\mu$ M | 27.1              | 3         |
| Eu <sup>3+</sup> /CQDs@MOF-253 | 13 nM              | 0-150 $\mu$ M                    | 42.3              | 4         |
| CQDs                           | 1.6 $\mu$ M        | 6-80 $\mu$ M                     | 4.7               | 5         |
| CQDs                           | 1.51 nM,<br>126 nM | 0-10 nM,<br>100-5000 nM          | 44.8              | 6         |
| CQDs                           | 10 nM              | 0-75 $\mu$ M                     | 10.75             | This work |

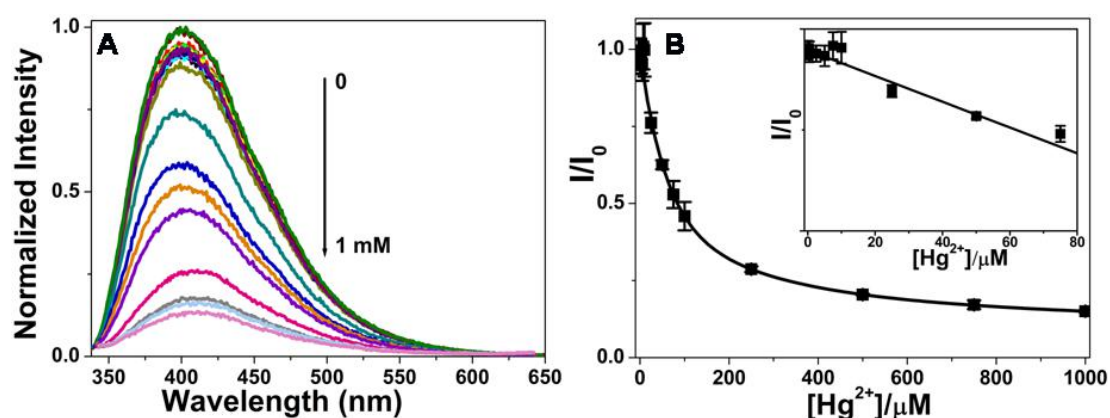

**Figure S9** (A) Fluorescence emission spectra of CQDs in the presence of different concentrations of Hg<sup>2+</sup> in tap water. (B) The plot of  $I/I_0$  versus the concentration of Hg<sup>2+</sup> in tap water, the inset is the linear section of the plot (performed in pH 5.0, 50 mM NaAc-HAc buffer;  $I_0$  and  $I$  correspond to the fluorescence intensity of CQDs at 415 nm in the absence and presence of Hg<sup>2+</sup>, respectively; excitation wavelength is 330 nm.).

#### References:

1. Guo, Y., Wang, Z., Shao, H., & Jiang, X., Hydrothermal synthesis of highly fluorescent carbon nanoparticles from sodium citrate and their use for the detection

- of mercury ions. *Carbon* **52**, 583-589 (2013).
2. Zhang, R. & Wei, C., Nitrogen-doped carbon quantum dots: Facile synthesis and application as a "turn-of" fluorescent probe for detection of Hg<sup>2+</sup> ions. *Biosens. Bioelectron.* **55**, 83-90 (2013).
  3. Cao, X. *et al.*, A facile microwave-assisted fabrication of fluorescent carbon nitride quantum dots and their application in the detection of mercury ions. *Spectrochim. Acta A.* **151**, 875-880 (2015).
  4. Xu, X.-Y. & Yan, B., Fabrication and application of a ratiometric and colorimetric fluorescent probe for Hg<sup>2+</sup> based on dual-emissive metal-organic framework hybrids with carbon dots and Eu<sup>3+</sup>. *J. Mater. Chem. C* **4**, 1543-1549 (2016).
  5. Wang, C. *et al.*, Synthesis of cellulose-derived carbon dots using acidic ionic liquid as a catalyst and its application for detection of Hg<sup>2+</sup>. *J. Mater. Sci.* **51**, 861-867 (2015).
  6. Zhang, C., Hu, Z., Song, L., Cui, Y., & Liu, X., Valine-derived carbon dots with colour-tunable fluorescence for the detection of Hg<sup>2+</sup> with high sensitivity and selectivity. *New J. Chem.* **39**, 6201-6206 (2015).
